# Supplementary material for: Assessment of Mechanical Damage and Germinability in Flaxseeds Using Hyperspectral Imaging
Source: MDPI journal article supplement (doi:10.3390/foods13010120), 2023-12-29
Supplement: s1 [file s1]

## Supplementary Material

# Assessment of Mechanical Damage and Germinability in Flaxseeds Using Hyperspectral Imaging

Mohammad Nadimi <sup>1</sup>, L. G. Divyanth <sup>2</sup>, Muhammad Mudassir Arif Chaudhry <sup>1</sup>, Taranveer Singh <sup>1</sup>, Georgia Loewen <sup>1</sup> and Jitendra Paliwal <sup>1,\*</sup>

<sup>1</sup> Department of Biosystems Engineering, University of Manitoba, Winnipeg, MB R3T 5V6, Canada; nadimim@myumanitoba.ca (M.N.); mudassir.chaudhry@umanitoba.ca (M.M.A.C.); singht9@myumanitoba.ca (T.S.); georgiabelle@hotmail.ca (G.L.)

<sup>2</sup> Center for Precision and Automated Agricultural Systems, Washington State University, Prosser, WA 99350, USA; divyanth.l.girija@wsu.edu (L.G.D.);

\* Correspondence: j.paliwal@umanitoba.ca

## PLS-DA for Vis-NIR and SWIR (without wavelength selection)

The following supplement analysis explores the performance of PLS-DA models without wavelength selection for the Vis-NIR and SWIR wavelength ranges. Our goal was to evaluate the impact of not using wavelength selection on the model performance. The same pre-processing techniques and sample size were used as described in the main paper.

Table S1. PLS-DA results for mechanical damage classification using Vis-NIR wavelength range (without wavelength selection).

| Calibration      |             |            |             |            |
|------------------|-------------|------------|-------------|------------|
|                  |             | True class |             | Recall (%) |
| Predicted class  | Nil/low     |            | Medium/high |            |
|                  | Nil/low     | 43         | 4           | 87.80      |
|                  | Medium/high | 6          | 45          | 91.80      |
| Precision (%)    |             | 91.80      | 87.80       |            |
| Cross-validation |             |            |             |            |
|                  |             | True class |             | Recall (%) |
| Predicted class  | Nil/low     |            | Medium/high |            |
|                  | Nil/low     | 43         | 5           | 87.80      |
|                  | Medium/high | 6          | 44          | 89.80      |
| Precision (%)    |             | 89.80      | 87.80       |            |
| Test             |             |            |             |            |
|                  |             | True class |             | Recall (%) |

| Predicted class | Nil/low | Medium/high |
|-----------------|---------|-------------|
| Nil/low         | 17      | 1           |
| Medium/high     | 4       | 21          |
| Precision (%)   | 95.50   | 81.00       |

Table S2. PLS-DA results for mechanical damage classification using SWIR wavelength range (without wavelength selection).

| <b>Calibration</b>      |            |             |            |
|-------------------------|------------|-------------|------------|
|                         | True class |             | Recall (%) |
| Predicted class         | Nil/low    | Medium/high |            |
| Nil/low                 | 50         | 5           | 92.60      |
| Medium/high             | 4          | 41          | 89.10      |
| Precision (%)           | 89.10      | 92.60       |            |
| <b>Cross-validation</b> |            |             |            |
|                         | True class |             | Recall (%) |
| Predicted class         | Nil/low    | Medium/high |            |
| Nil/low                 | 49         | 6           | 90.70      |
| Medium/high             | 5          | 40          | 87.00      |
| Precision (%)           | 87.00      | 90.70       |            |
| <b>Test</b>             |            |             |            |
|                         | True class |             | Recall (%) |
| Predicted class         | Nil/low    | Medium/high |            |
| Nil/low                 | 17         | 2           | 94.40      |
| Medium/high             | 1          | 24          | 92.30      |
| Precision (%)           | 92.30      | 94.40       |            |
